# Supplementary material for: Extraction of phytochemicals from the pomegranate (Punica granatum L., Punicaceae) by reverse iontophoresis
Source: Royal Society of Chemistry journal article supplement (doi:10.1039/d3ra01242e), 2023-01-01

## Supplementary Information

Extraction of phytochemicals from the pomegranate (*Punica granatum L.*, *Punicaceae*) by reverse iontophoresis

Kieran Moore <sup>a</sup>, Shaun Reeksting <sup>b</sup>, Vimal Nair <sup>c</sup>, Steve Pannakal <sup>c</sup>, Nita Roy <sup>c</sup>, Joan Eilstein <sup>c</sup>, Sébastien Grégoire <sup>d</sup>, M. Begoña Delgado-Charro <sup>a</sup>, Richard H. Guy <sup>a</sup>.

<sup>a</sup>Department of Life Sciences, University of Bath, UK.

<sup>b</sup>Agilent Technologies LDA UK, 5500 Lakeside, Cheshire, UK.

<sup>c</sup>Advanced Research, L'Oréal Research and Innovation India, Bangalore, India.

<sup>d</sup>L'Oréal, Aulnay-sous-Bois, France.

| Time (min) | % B (C18) | %B (HILIC) |
|------------|-----------|------------|
| 0.0        | 5         | 100        |
| 1.0        | 20        | -          |
| 4.0        | 45        | -          |
| 4.5        | 95        | -          |
| 6.5        | 95        | -          |
| 7.0        | 5         | -          |
| 8.0        | 95        | -          |
| 10.0       | 95        | -          |
| 10.5       | 5         | -          |
| 11.5       | -         | 30         |
| 12.0       | -         | 100        |
| 12.5       | 5         | -          |
| 15.0       | -         | 100        |

**Supplementary Table S1:**  
Chromatographic separation schedules.

**Supplementary Table S2:** LC-MS operational conditions for the two analysis methods employed.

| <b>Parameter</b>                              | <b>C18 method</b> | <b>HILIC method</b> |
|-----------------------------------------------|-------------------|---------------------|
| Injection volume ( $\mu\text{L}$ )            | 5                 | 5                   |
| Mobile phase flow rate (mL/min)               | 0.4               | 0.5                 |
| Gas temperature ( $^{\circ}\text{C}$ )        | 250               | 300                 |
| Drying gas flow rate (L/min)                  | 12                | 13                  |
| Nebulising gas pressure (bar)                 | 3.1               | 2.1                 |
| Sheath gas temperature ( $^{\circ}\text{C}$ ) | 350               | 350                 |
| Sheath gas flow rate (L/min)                  | 12                | 12                  |
| VCap voltage (V)                              | 3500              | 1500                |
| Fragmentor voltage (V)                        | 125               | 100                 |
| Skimmer voltage (V)                           | 45                | 40                  |
| MS/MS scan segment collision energies (eV)    | 0, 20, 40         | 0, 20, 40           |

**Supplementary Table S3:** Summary of mass spectrometric data for bioactive compounds generated from *ex vivo* and *in vivo* RI experiments with their relevant physicochemical parameters. Putative hits were qualified based on precursor ppm mass error (within 5 ppm) with at least two curated fragment ions within 10 ppm mass error.

| RT (min) | HPLC column | Putative phytochemical name (CAS number)           | pK <sub>a</sub> (s)            | Charge at pH 7.4 | Metabolite Class    | Molecular Formula                                            | ES(-/+) theor. m/z | ES(-/+) found m/z | Adduct             | m/z error (ppm) | MS/MS ES(-) fragment ions                                                    |
|----------|-------------|----------------------------------------------------|--------------------------------|------------------|---------------------|--------------------------------------------------------------|--------------------|-------------------|--------------------|-----------------|------------------------------------------------------------------------------|
| 0.87*    | C18         | Citric acid <sup>†</sup> (320-77-4)                | 3.1<br>4.8<br>6.4 <sup>a</sup> | -3               | Organic acid        | C <sub>6</sub> H <sub>8</sub> O <sub>7</sub>                 | 191.0192           | 191.0199          | [M-H] <sup>-</sup> | 3.7             | 57.0346<br>67.0189<br>85.0295<br>87.0088<br>111.0088<br>154.9986<br>173.0092 |
| 6.97     | C18         | Luteolin 7-β-rutinoside <sup>†§</sup> (20633-84-5) | 8.3 <sup>b</sup>               | 0                | Flavonoid glycoside | C <sub>27</sub> H <sub>30</sub> O <sub>15</sub>              | 593.1506           | 593.1513          | [M-H] <sup>-</sup> | 1.2             | 227.0383<br>255.0302<br>284.0302<br>285.04<br>286.0427<br>327.0510           |
| 4.98     | C18         | (-)-Epicatechin <sup>†</sup> (490-46-0)            | 8.3<br>(1)                     | 0                | Flavonoid           | C <sub>15</sub> H <sub>14</sub> O <sub>6</sub>               | 289.0712           | 289.0718          | [M-H] <sup>-</sup> | 2.1             | 109.0295<br>179.0350<br>203.0714<br>205.0506<br>245.0819                     |
| 6.60     | C18         | Rutin <sup>†</sup> (115888-40-9)                   | 6.4 <sup>b</sup>               | -1               | Flavonoid glycoside | C <sub>27</sub> H <sub>30</sub> O <sub>16</sub>              | 609.1456           | 609.1457          | [M-H] <sup>-</sup> | 0.2             | 178.9986<br>300.0334<br>301.0412                                             |
| 6.70*    | C18         | Ellagic acid <sup>†‡§  </sup> (476-66-4)           | 5.4<br>6.8<br>(2)              | -2               | Tannin              | C <sub>14</sub> H <sub>6</sub> O <sub>8</sub>                | 300.9984           | 300.9987          | [M-H] <sup>-</sup> | 1.0             | 257.0086<br>284.9994                                                         |
| 9.49*    | HILIC       | Histidine <sup>§  </sup> (71-00-1)                 | 1.8<br>6.0<br>9.2 <sup>a</sup> | 0                | Amino acid          | C <sub>6</sub> H <sub>9</sub> N <sub>3</sub> O <sub>2</sub>  | 156.0773           | 156.0772          | [M+H] <sup>+</sup> | -0.6            | 81.0448<br>82.0527<br>93.045<br>83.0601<br>110.0714                          |
| 10.42*   | HILIC       | Lysine <sup>§</sup>                                | 2.2                            | +1               | Amino acid          | C <sub>6</sub> H <sub>14</sub> N <sub>2</sub> O <sub>2</sub> | 147.1133           | 147.1129          | [M+H] <sup>+</sup> | -2.7            | 56.0495                                                                      |

|       |       |                                                        |                                 |    |              |                                                               |          |          |                    |      |                                            |
|-------|-------|--------------------------------------------------------|---------------------------------|----|--------------|---------------------------------------------------------------|----------|----------|--------------------|------|--------------------------------------------|
|       |       | (923-27-3)                                             | 9.0<br>10.5 <sup>a</sup>        |    |              |                                                               |          |          |                    |      | 84.0808                                    |
| 9.88* | HILIC | Arginine <sup>§</sup><br>(74-79-3)                     | 2.2<br>9.0<br>12.5 <sup>a</sup> | +1 | Amino acid   | C <sub>6</sub> H <sub>14</sub> N <sub>4</sub> O <sub>2</sub>  | 175.1195 | 175.1193 | [M+H] <sup>+</sup> | -1.1 | 60.0570<br>70.0651<br>116.0706<br>130.0975 |
| 8.88* | HILIC | Aspartic acid <sup>§  </sup><br>(56-84-8)              | 1.9<br>3.7<br>9.6 <sup>a</sup>  | -1 | Amino acid   | C <sub>4</sub> H <sub>7</sub> NO <sub>4</sub>                 | 134.0450 | 134.0453 | [M+H] <sup>+</sup> | -2.2 | 46.0286<br>70.0288<br>74.0238<br>116.0341  |
| 9.36* | HILIC | Glutamylglutamic<br>acid <sup>§  </sup><br>(3929-61-1) | 2.2<br>4.3<br>9.7 <sup>ad</sup> | -2 | Dipeptide    | C <sub>10</sub> H <sub>16</sub> N <sub>2</sub> O <sub>7</sub> | 277.1035 | 277.1041 | [M+H] <sup>+</sup> | 2.2  | 84.0450<br>130.0496<br>148.06              |
| 0.81  | C-18  | Malic acid <sup>§  </sup><br>(6915-15-7)               | 3.5<br>5.0 <sup>c</sup>         | -2 | Organic acid | C <sub>4</sub> H <sub>6</sub> O <sub>5</sub>                  | 133.0137 | 133.0144 | [M-H] <sup>-</sup> | 5.3  | 71.0139<br>72.9930<br>115.0033             |
| 7.13  | C-18  | Abscisic acid <sup>§</sup> (7773-<br>56-0)             | 4.7 <sup>b</sup>                | -1 | Phytohormone | C <sub>15</sub> H <sub>20</sub> O <sub>4</sub>                | 263.1283 | 263.1288 | [M-H] <sup>-</sup> | 1.9  | 153.0919<br>203.1077<br>219.1386           |

<sup>a</sup> <https://www.rsc.org/merck-index>

<sup>b</sup> <https://hmdb.ca/metabolites>

<sup>c</sup> <https://pubchem.ncbi.nlm.nih.gov>

<sup>d</sup> pK<sub>a</sub> values based on those of glutamic acid

\*Verified with analytical reference standard

† RI extraction (isolated peel) confirmed from unknown cultivar (Israel)

‡ RI extraction *in fructo* confirmed from Hicaz (Turkey)

§ RI extraction *in fructo* confirmed from Aco (South Africa)

|| RI extraction *in fructo* confirmed from Wonderful (Peru)

**Supplementary Table S4:** Intra-fruit variability in two Hicaz (Turkey) pomegranates

| Peel section | Ellagic acid concentration in dry peel ( $\mu\text{g}/\text{mg}$ ) |                                 |
|--------------|--------------------------------------------------------------------|---------------------------------|
|              | Experiment P1A & P1B                                               | Experiment P2A & P2B            |
| Top          | 2.62 ( $\pm$ 0.19)                                                 | 1.53 ( $\pm$ 0.10) <sup>b</sup> |
| Middle       | 1.96 ( $\pm$ 0.22) <sup>a,b</sup>                                  | 1.57 ( $\pm$ 0.04) <sup>b</sup> |
| Bottom       | 2.72 ( $\pm$ 0.20)                                                 | 1.94 ( $\pm$ 0.06)              |

<sup>a</sup> Significantly different to Top

<sup>b</sup> Significantly different to Bottom

**Supplementary Table S5:** Measured parameters from the reverse iontophoresis extraction of ellagic acid (EA) on intact pomegranates

| Cultivar           | % loss on drying | pH of dry peel suspension | Ellagic acid in dry peel ( $\mu\text{g}/\text{mg}$ ) | EA extracted in 1 <sup>st</sup> hr (ng) | EA extracted in 2 <sup>nd</sup> hr (ng) |
|--------------------|------------------|---------------------------|------------------------------------------------------|-----------------------------------------|-----------------------------------------|
| Aco (South Africa) | 69               | 3.7                       | 3.78 ( $\pm$ 1.70)                                   | 2060 ( $\pm$ 1001)                      | 1321 ( $\pm$ 1069)                      |
| Wonderful (Peru)   | 63               | 3.4                       | 1.09 ( $\pm$ 0.04)                                   | 53 ( $\pm$ 33)                          | 58 ( $\pm$ 32)                          |

**Supplementary Figure S1:** Details of the four peel preparation procedures examined.

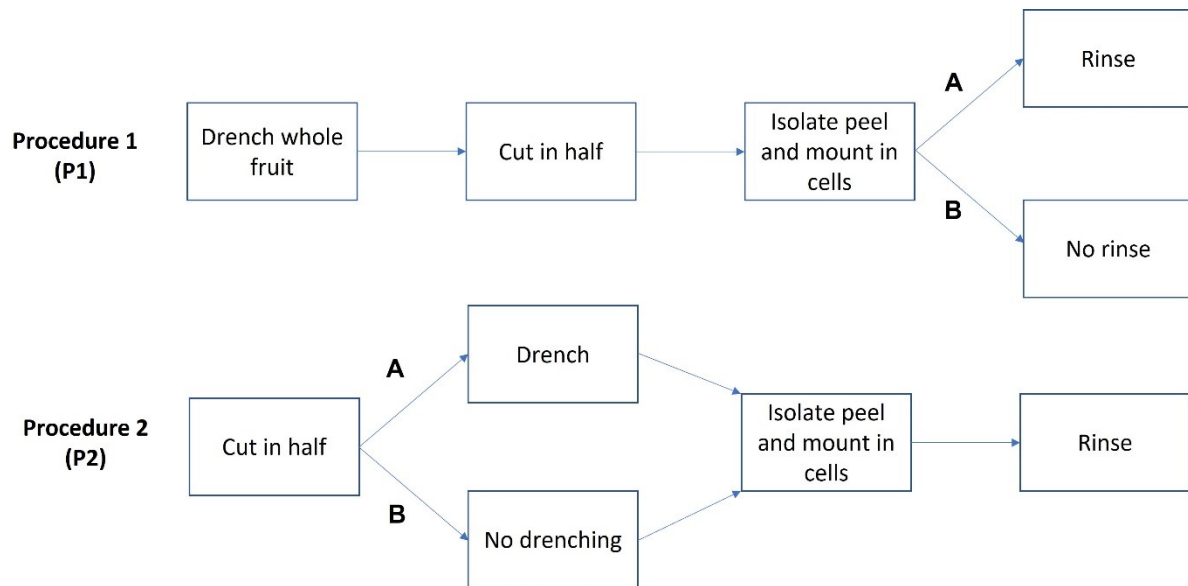

**Supplementary Figure S2:** Cumulative passive extraction of ellagic acid following [left panel] P1A and P1B, and [right panel] P2A and P2B (mean  $\pm$  SD;  $n = 5$  except for P2B for which  $n = 6$ ).

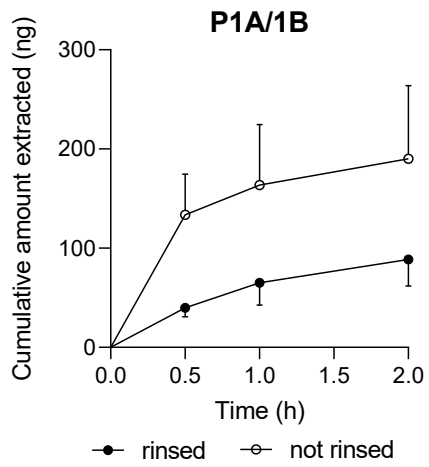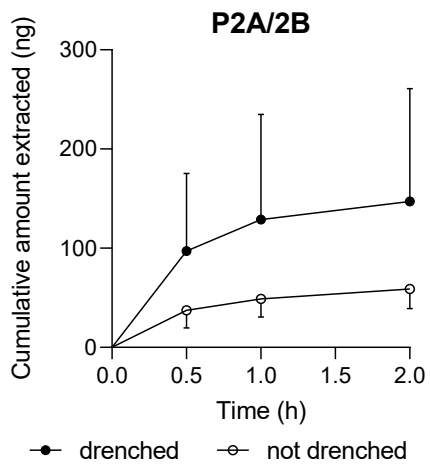





**Supplementary Figure S3:** Cumulative reverse iontophoretic extraction of ellagic acid at pH 4.0 from the isolated peels of Hicaz and Wonderful pomegranates at currents 3 mA current. Extraction to anode (closed circles,  $n = 4$  or  $5$ ), cathode (closed triangles,  $n = 5$ ) and passively (open squares,  $n = 1$  or  $3$ ) (mean  $\pm$  SD). Data points are slightly offset for clarity.

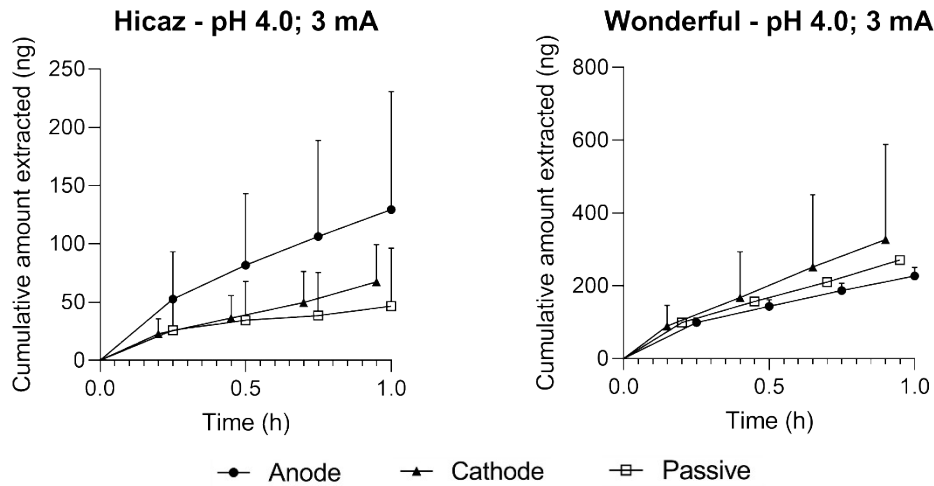

**Supplementary Figure S4:** Pooled anode-to-cathode extraction ratios of paracetamol as a function of the time of current (0.2 mA) application at pH 4.0 and pH 7.4 (geometric mean  $\pm$  SD;  $n \geq 9$  and  $n = 5$ , respectively).

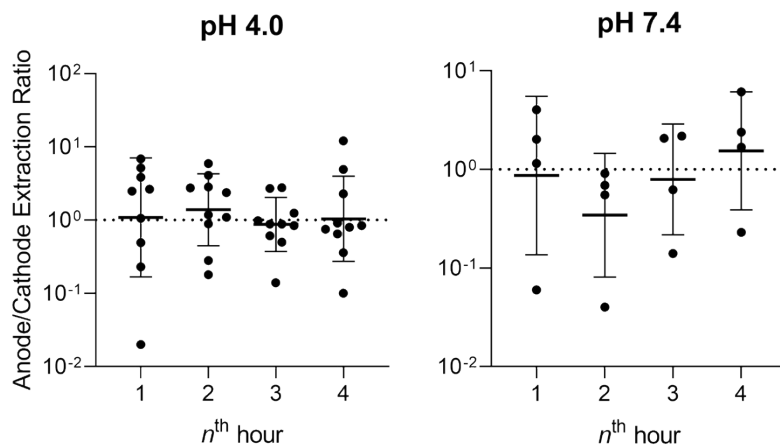

**Supplementary Figure S5:** Representative ellagic acid analysis of a RI extracted anodal sample from an intact Aco pomegranate *in fructo* after 1 h of current passage. Left panel - extracted ion chromatogram (EIC). Middle panel - molecular ion  $[M-H]^-$  MS/MS spectrum. Right panel - MS/MS spectrum.

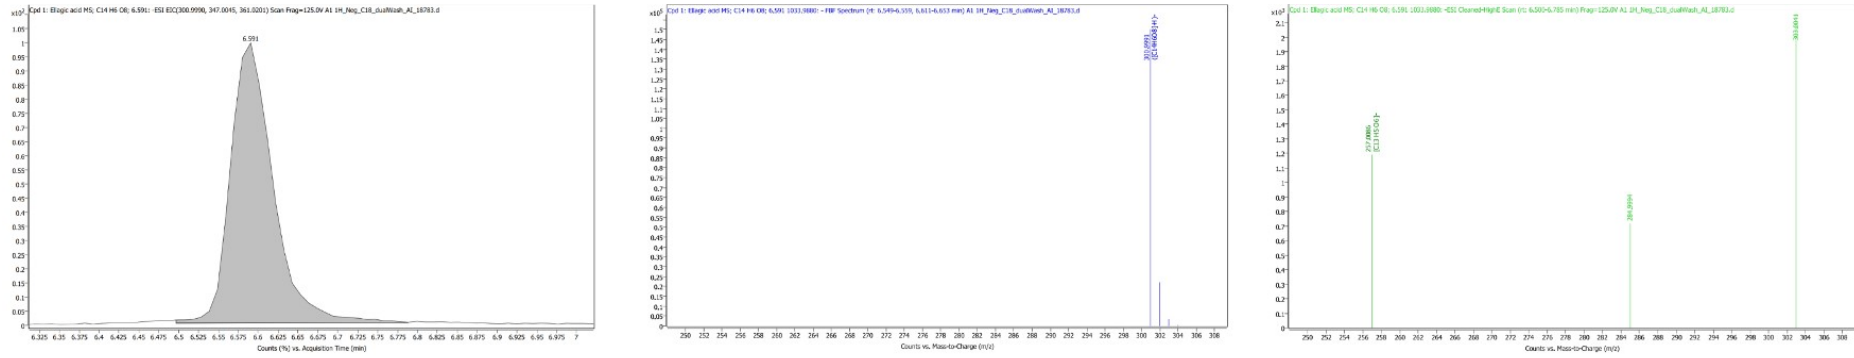

**Supplementary Figure S6:** Representative histidiine analysis of a RI extracted cathodal sample from an intact Aco pomegranate *in fructo* after 1 h of current passage. Left panel - extracted ion chromatogram (EIC). Middle panel - molecular ion  $[M+H]^+$  MS/MS spectrum. Right panel - MS/MS spectrum.

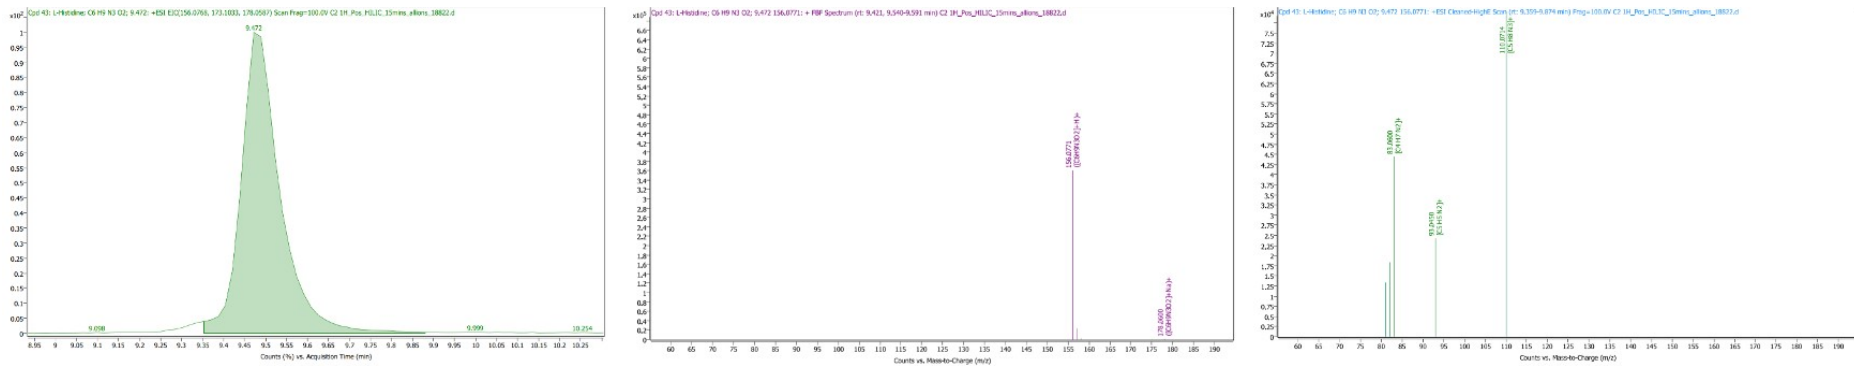

Supplement: d3ra01242e7.pdf [file d3ra01242e7.pdf]
