# Supplementary material for: Extraction of phytochemicals from the pomegranate (Punica granatum L., Punicaceae) by reverse iontophoresis
Source: Royal Society of Chemistry journal article supplement (doi:10.1039/d3ra01242e), 2023-01-01

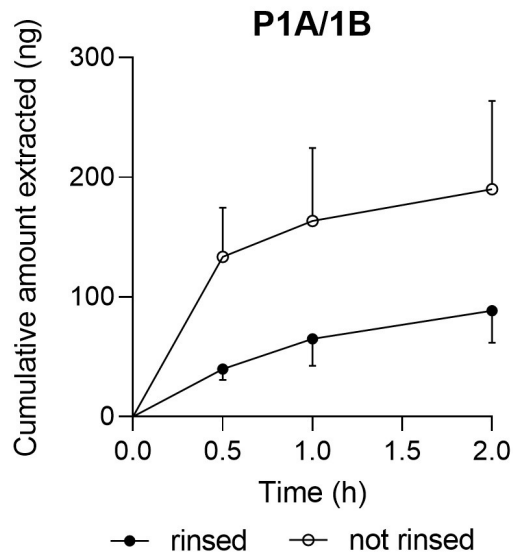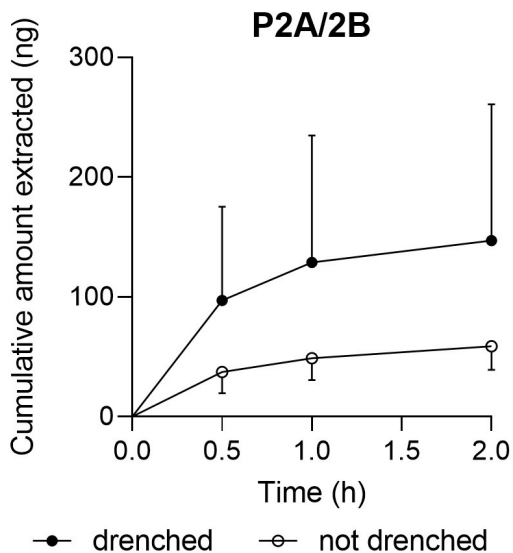

Supplement: d3ra01242e2.pdf [file d3ra01242e2.pdf]
