# Supplementary material for: Extraction of phytochemicals from the pomegranate (Punica granatum L., Punicaceae) by reverse iontophoresis
Source: Royal Society of Chemistry journal article supplement (doi:10.1039/d3ra01242e), 2023-01-01

**Hicaz - pH 4.0; 3 mA**

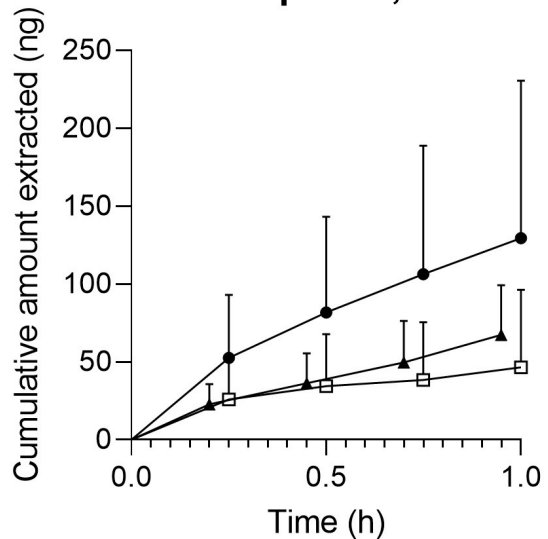

**Wonderful - pH 4.0; 3 mA**

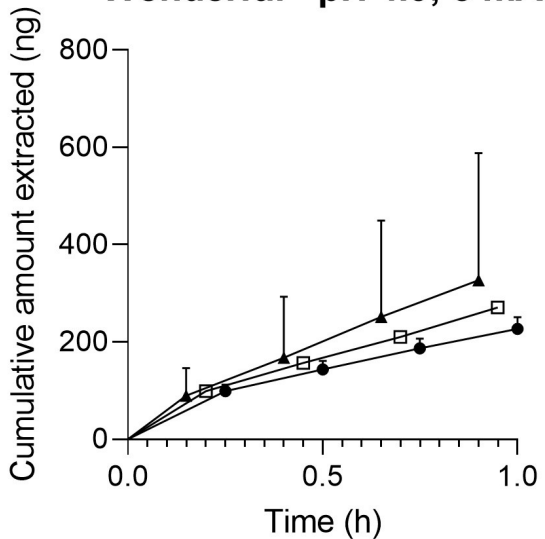

Supplement: d3ra01242e3.pdf [file d3ra01242e3.pdf]
